# Supplementary material for: Decreased outlet angle of the superior cerebellar artery as indicator for dolichoectasia in late onset Pompe disease
Source: PubMed Central journal article supplement (PMC5899367; doi:10.1186/s13023-018-0794-6), 2018-04-13

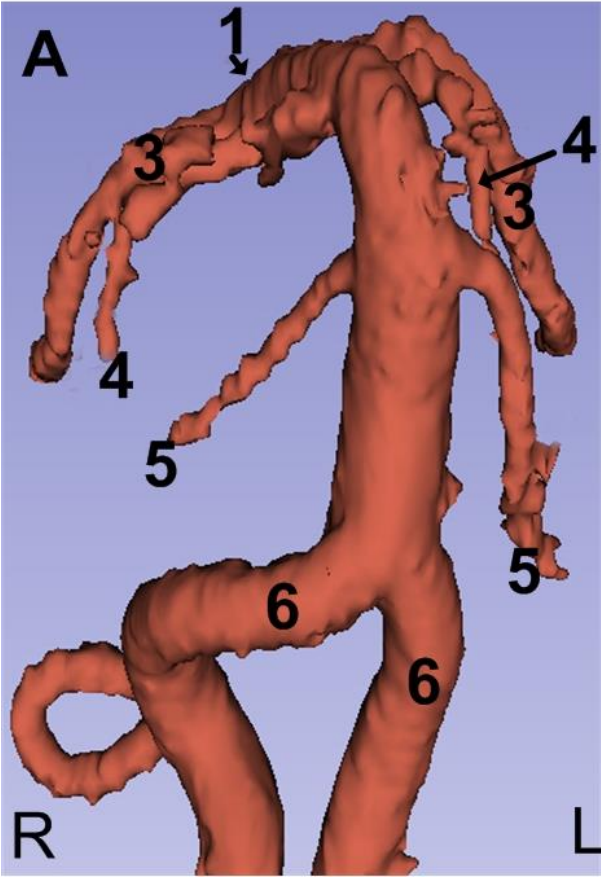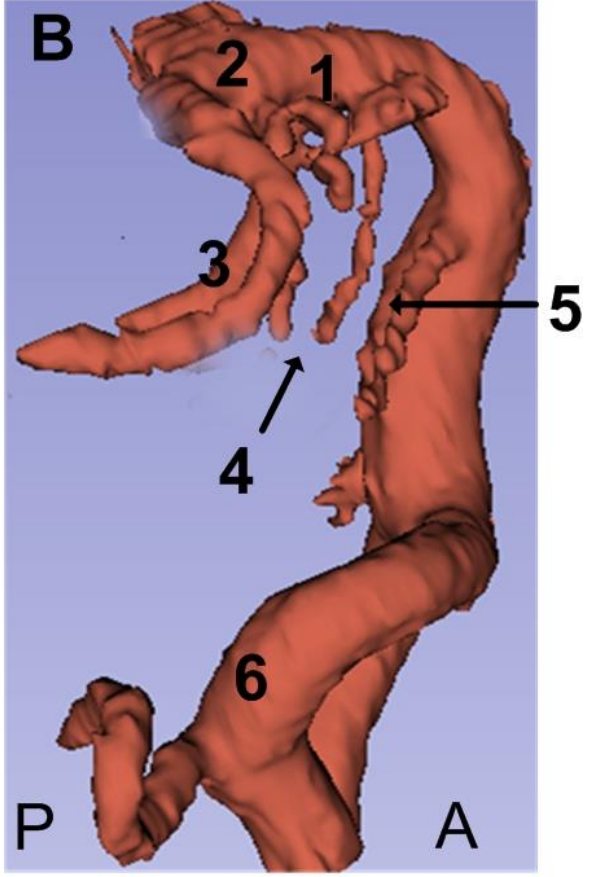

Supplement: 13023_2018_794_MOESM1_ESM.pdf [file 13023_2018_794_MOESM1_ESM.pdf]
